# Supplementary material for: Challenges of the Unknown: Clinical Application of Microbial Metagenomics
Source: Int J Genomics. 2015 Sep 14;2015:292950. doi: 10.1155/2015/292950 (PMC4584244; doi:10.1155/2015/292950)
Supplement: Supplementary file 1 — Supplementary material contains genome details of the 25 viral references used within the targeted mapping based approach. Table S1 lists the sequence accession number, fasta header description and the different viral genome features within the panel - DNA/RNA, single/double stranded, sense/antisense. [file 292950.f1.xlsx]

## Sheet: Table S1
	Table S1. Reference genomes for identification of 25 target viruses within the viral sample using the targeted mapping based approach
	Reference	NCBI accession number(s)	Description	Genome	Strand/Sense
	Adenovirus 2	NC_001405.1	Human adenovirus C, complete genome	DNA	double-stranded
	Adenovirus 41	DQ315364.2	Human adenovirus 41 isolate Tak, complete genome	DNA	double-stranded
	Astrovirus	NC_001943.1	Human astrovirus, complete genome	RNA	single-stranded/ positive sense
	Coronavirus 229E	NC_002645.1	Human coronavirus 229E, complete genome	RNA	single-stranded/positive sense
	Coxsackievirus B4	AF311939.1	Human coxsackievirus B4 strain E2 variant, complete genome	RNA	single-stranded/positive sense
	Cytomegalovirus	BK000394.5	TPA_inf: Human herpesvirus 5 strain AD169 substrain varUK, complete genome	DNA	double-stranded
	Epstein-Barr virus	NC_007605.1	Human herpesvirus 4 complete wild type genome	DNA	double-stranded
	Herpes simplex virus 1	NC_001806.1	Human herpesvirus 1, complete genome	DNA	double-stranded
	Herpes simplex virus 2	JN561323.2	Human herpesvirus 2 strain HG52, complete genome	DNA	double-stranded
	Influenza A H1N1	JX625384.1-JX625391.1	Influenza A virus (A/England/506/2009(H1N1)), segments	RNA	single-stranded/negative sense
	Influenza A H3N2	KJ942616.1-KJ942623.1	Influenza A virus (A/Texas/50/2012(H3N2)), segments	RNA	single-stranded/negative sense
	Influenza B virus	NC_002204.1-NC_002211.1	Influenza B virus, segments	RNA	single-stranded/negative sense
	Metapneumovirus A	NC_004148.2	Human metapneumovirus, complete genome	RNA	single-stranded/negative sense
	Norovirus GI	KF429789.1	Norovirus Hu/GI.1/8MC/1978/USA, complete genome	RNA	single-stranded/positive sense
	Norovirus GII	KC409301.1	Norovirus Hu/GII/20469/2010/VNM, complete genome	RNA	single-stranded/positive sense
	Parainfluenza virus 1	NC_003461.1	Human parainfluenza virus 1, complete genome	RNA	single-stranded/negative sense
	Parainfluenza virus 2	NC_003443.1	Human parainfluenza virus 2, complete genome	RNA	single-stranded/negative sense
	Parainfluenza virus 3	NC_001796.2	Human parainfluenza virus 3, complete genome	RNA	single-stranded/negative sense
	Parainfluenza virus 4	JQ241176.1	Human parainfluenza virus 4b strain 04-13, complete genome	RNA	single-stranded/negative sense
	Parechovirus 3	AJ889918.1	Human parechovirus 3 genomic RNA, complete genome, isolate Can82853-01	RNA	single-stranded/positive sense
	Respiratory syncytial virus A	JF920069.1	Human respiratory syncytial virus strain A/WI/629-3/06-07, complete genome	RNA	single-stranded/negative sense
	Rhinovirus A39	AY751783.1	Human rhinovirus 39, complete genome	RNA	single-stranded/positive sense
	Rotavirus A RVA	JQ688673.1-JQ688683.1	Rotavirus A strain RVA/Simian-tc/ZAF/SA11-N5/1958/G3P[2], segments	RNA	double-stranded
	Sapovirus	NC_006269.1	Sapovirus Hu/Dresden/pJG-Sap01/DE, complete genome	RNA	single-stranded/positive sense
	Varicella zoster virus	KJ767491.1	Human herpesvirus 3 strain YC01, complete genome	DNA	double-stranded
